# Supplementary material for: Nanobodies dismantle post‐pyroptotic ASC specks and counteract inflammation in vivo
Source: PubMed Central journal article supplement (PMC9174887; doi:10.15252/emmm.202115415), 2022-04-19
Supplement: EMMM-14-e15415-s005.pdf [file EMMM-14-e15415-s005.pdf]

Bertheloot et al.

*Nanobodies dismantle post-pyroptotic ASC specks and counteract inflammation in vivo*

Original uncropped Western-blot images - Figure 1B

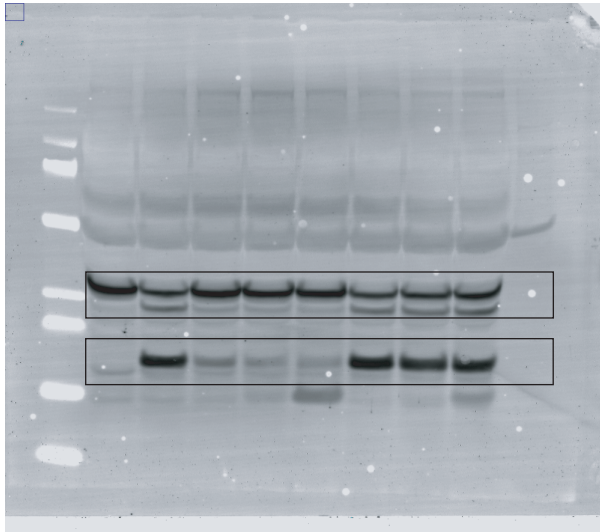

IB: IL-1 $\beta$

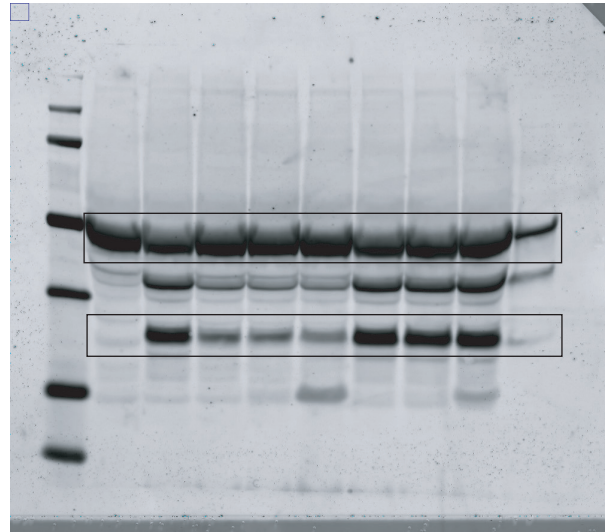

IB: Caspase-1
