# Supplementary material for: Nanobodies dismantle post‐pyroptotic ASC specks and counteract inflammation in vivo
Source: PubMed Central journal article supplement (PMC9174887; doi:10.15252/emmm.202115415), 2022-04-19

Bertheloot et al.

***Nanobodies dismantle post-pyroptotic ASC specks and counteract inflammation in vivo***

**Original uncropped Western-blot images - Figure 2C**

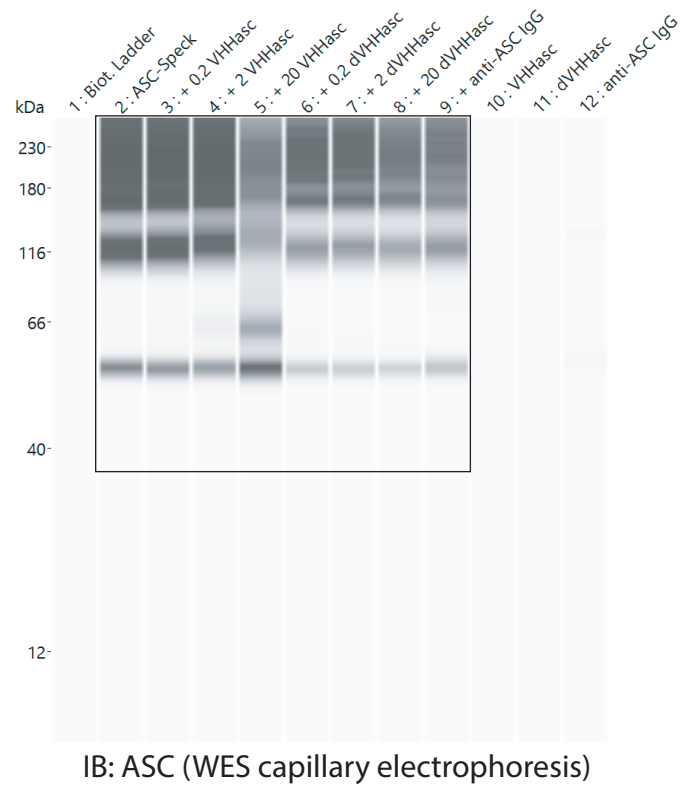

Supplement: EMMM-14-e15415-s010.pdf [file EMMM-14-e15415-s010.pdf]
