# Supplementary material for: Nanobodies dismantle post‐pyroptotic ASC specks and counteract inflammation in vivo
Source: EMBO Mol Med. 2022 Apr 19;14(6):e15415. doi: 10.15252/emmm.202115415 (PMC9174887; doi:10.15252/emmm.202115415)
Supplement: Supplementary file 1 — Appendix [file EMMM-14-e15415-s001.pdf]

# **Single-domain antibodies against ASC disassemble post-pyroptotic inflammasomes and reveal their role in inflammatory diseases**

Damien Berthelot<sup>1</sup>, Carlos W. de Souza Wanderley<sup>2,3</sup>, Ayda Henriques Schneider<sup>2,3</sup>, Lisa Schiffelers<sup>1</sup>, Jennifer D. Wuerth<sup>1</sup>, Jan Tödtmann<sup>4</sup>, Salie Maasewerd<sup>1</sup>, Ibrahim Hawwari<sup>1</sup>, Fraser Duthie<sup>1</sup>, Cornelia Rohland<sup>1</sup>, Lucas S. Ribeiro<sup>1</sup>, Lea Jenster<sup>1</sup>, Nathalia Rosero<sup>1</sup>, Yonas Mehari Tesfamariam<sup>1</sup>, Fernando Q. Cunha<sup>2,3</sup>, Florian I. Schmidt<sup>1, 4</sup> and Bernardo S. Franklin<sup>1</sup>

## **Affiliations:**

<sup>1</sup>Institute of Innate Immunity, Medical Faculty, University of Bonn, 53127 Bonn, NRW, Germany.

<sup>2</sup>Center for Research in Inflammatory Diseases (CRID), Ribeirao Preto Medical School, University of Sao Paulo, Brazil.

<sup>3</sup>Department of Pharmacology, Ribeirao Preto Medical School, University of Sao Paulo, Brazil.

<sup>4</sup>Core Facility Nanobodies, Medical Faculty, University of Bonn, 53127 Bonn, Germany

Correspondence: [d.berthelot@uni-bonn.de](mailto:d.berthelot@uni-bonn.de), [fschmidt@uni-bonn.de](mailto:fschmidt@uni-bonn.de), [franklin@uni-bonn.de](mailto:franklin@uni-bonn.de)

**Running Title:** VHH<sub>ASC</sub> targets extracellular ASC specks.

## **Appendix Table of Contents**

1. **Appendix Figures S1** - VHH<sub>ASC</sub> disrupts released ASC specks
2. **Appendix Figures S2** - Maximum IL-1 $\beta$  secretion is reached early in inflammasome activation of primary human macrophages
3. **Appendix Figures S3** - VHH<sub>mASC</sub> ameliorates MSU gouty inflammation
4. **Appendix Figures S4** - Local VHH<sub>mASC</sub> ameliorates MSU gouty inflammation

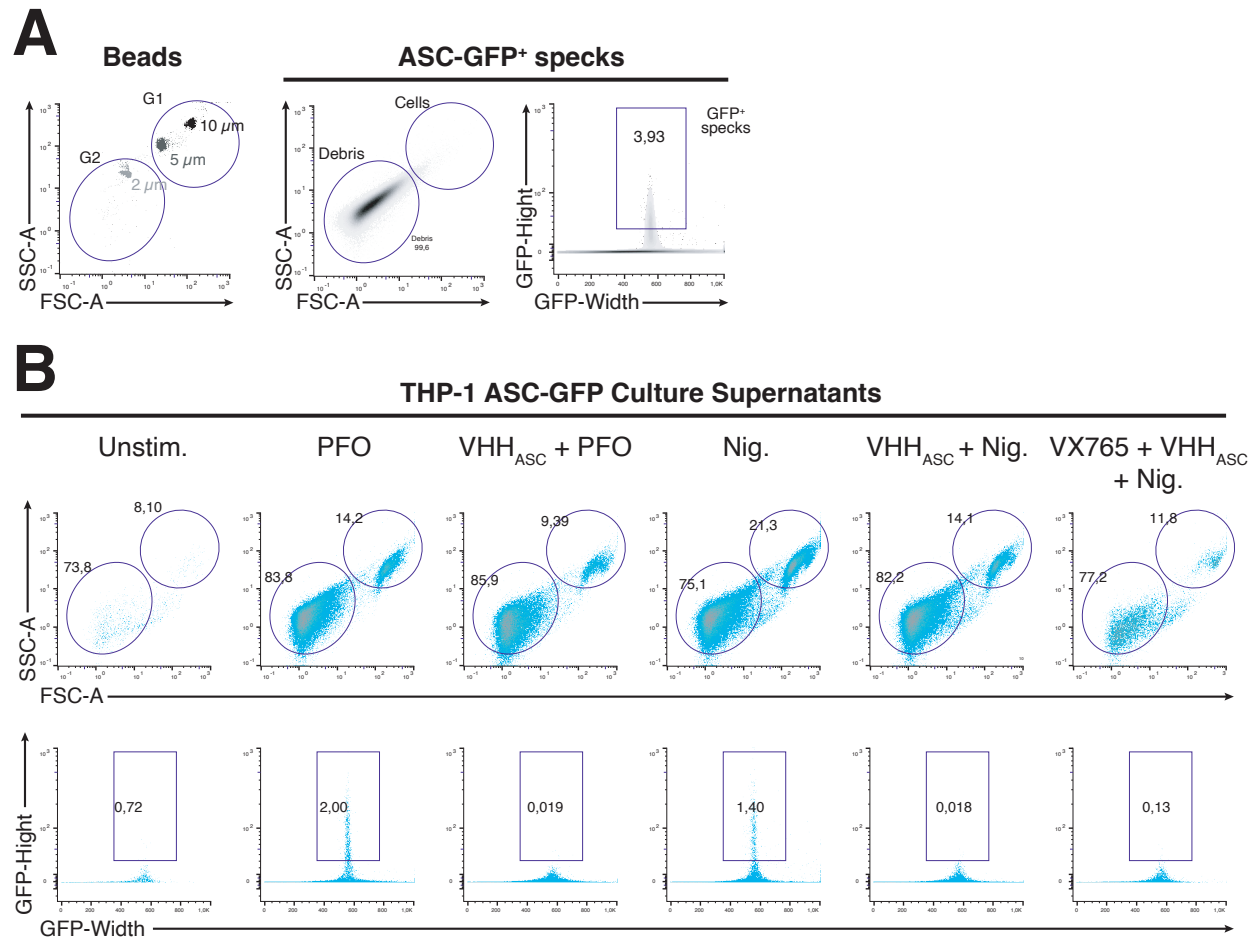

**Appendix Figure S1. VHH<sub>ASC</sub> disrupts released ASC specks** (A) Flow cytometry plots representing the method used to analyse GFP<sup>+</sup> specks from cell-reduced supernatants. Beads of 10, 5 or 2  $\mu\text{m}$  diameter were used as size “calibrator”. (B) Example of flow cytometry analysis of supernatants from PMA-differentiated THP-1 cells expressing ASC-GFP and left untreated, or pre-incubated with VHH<sub>ASC</sub> (100  $\mu\text{g}$  ml<sup>-1</sup>), or VX-765 (50  $\mu\text{M}$ ) for 30 min before activation with PFO (30 ng ml<sup>-1</sup>) or nigericin (10  $\mu\text{M}$ ) for 3.5h.

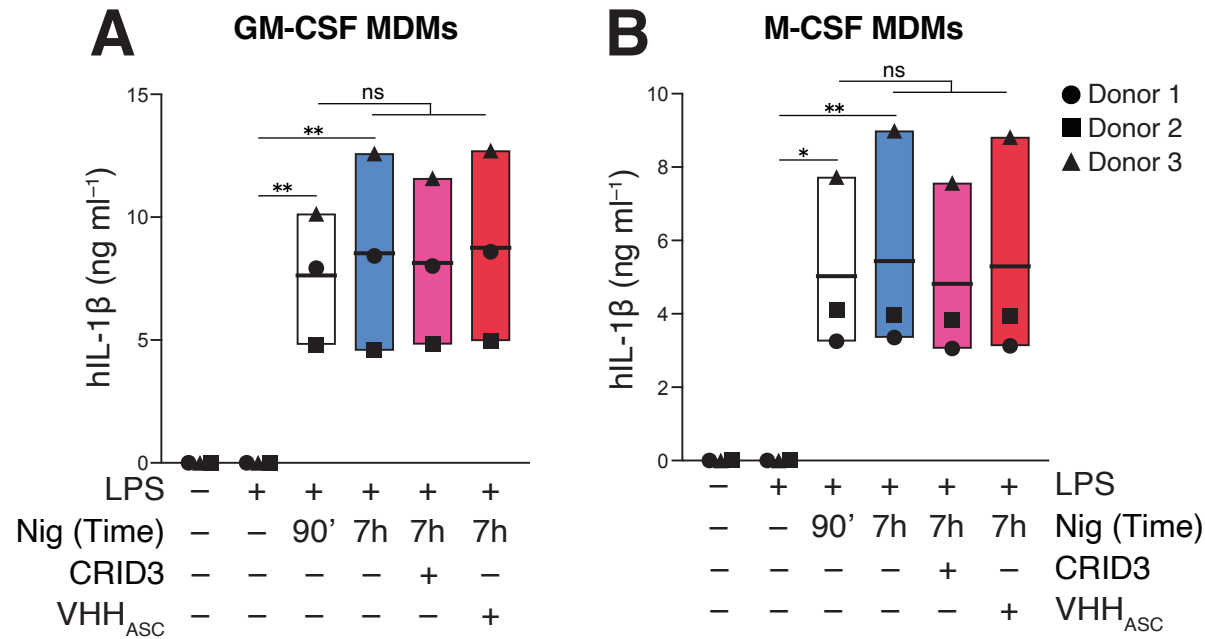

**Appendix Figure S2. Maximum IL-1 $\beta$  secretion is reached early in inflammasome activation of primary human macrophages.** (A) IL-1 $\beta$  levels measured in cell-free supernatants of primary human macrophages (hMDMs) at 90 min (90') or 7 hours (7h) of inflammasome activation. Cells were generated by differentiating primary human monocytes with GM-CSF (A) or M-CSF (B) from three blood donors. hMDMs were primed with LPS (10 ng ml<sup>-1</sup>) for 3 hours, followed by stimulation with nigericin (10  $\mu$ M) for the indicated time. In some conditions, CRID3 (2.5  $\mu$ M) or VHH<sub>ASC</sub> (200  $\mu$ g ml<sup>-1</sup>) was added to cells after 90 min of nigericin-stimulation and IL-1 $\beta$  levels were assessed at 7 hours post stimulation. Data is from two experiment with a total of three blood donors. Each symbol represents one donor. ns,  $p > 0.05$ ; \*,  $p < 0.05$ ; \*\*,  $p < 0.005$ , One-way ANOVA, multiple comparison (Tukey test).

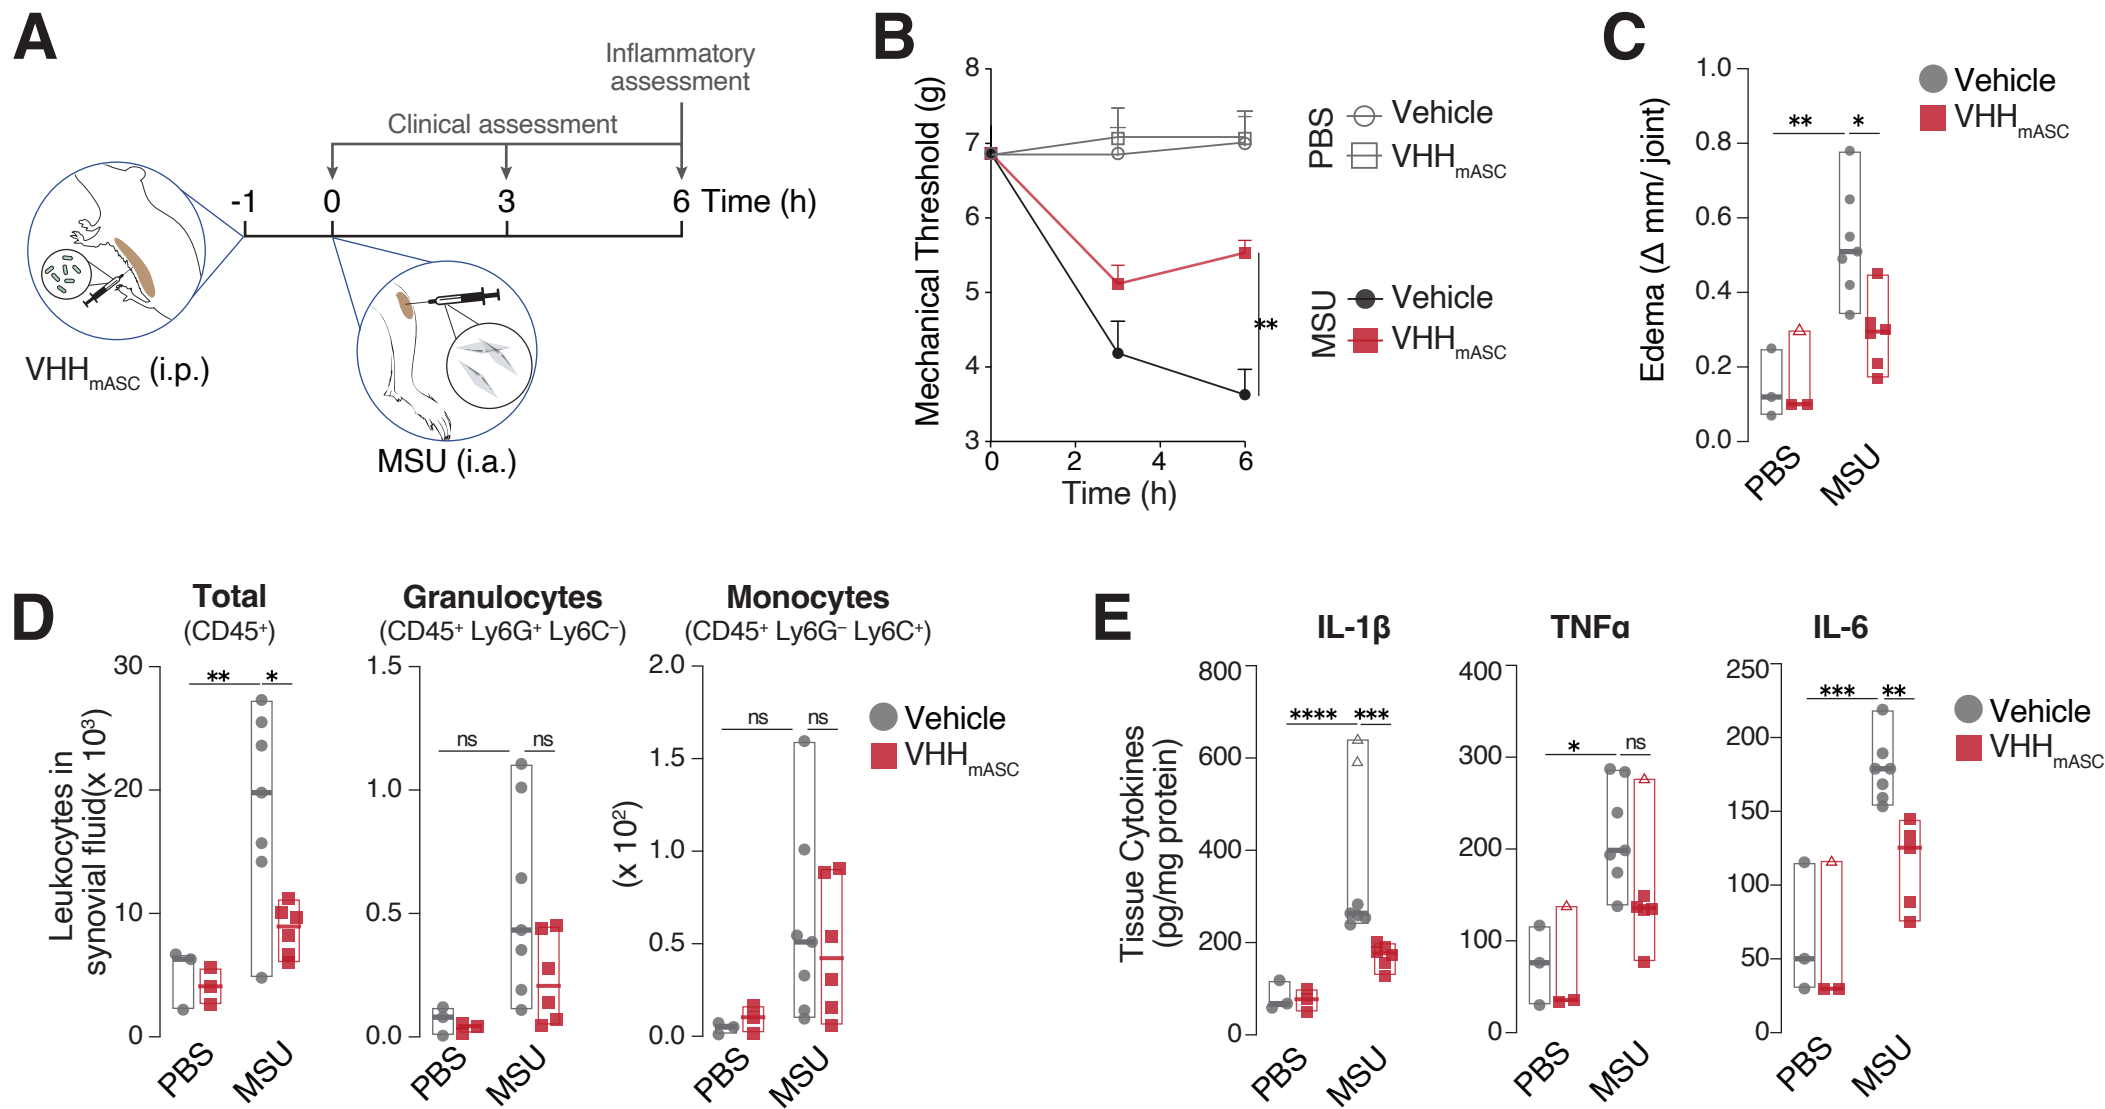

**Appendix Figure S3. VHH<sub>mASC</sub> ameliorates MSU gouty inflammation.** (A) Schematic representation of the experimental setting used for the MSU-gout model. Mice were injected intraperitoneally (i.p.) with VHH<sub>mASC</sub> (5 mg/kg) or vehicle (PBS) 1h prior to the intra-articular (i.a.) injection of 100 µg of monosodium urate (MSU) crystals into the knee. Mechanical allodynia threshold (B) was evaluated at 3 and 6 hour post-challenge and edema (C) was evaluated at 6 hour post-challenge. (D) Flow cytometric assessment of infiltrating total leukocytes (CD45<sup>+</sup>), granulocytes (CD45<sup>+</sup> Ly6G<sup>+</sup> Ly6C<sup>-</sup>), and inflammatory monocytes (CD45<sup>+</sup> Ly6G<sup>-</sup> Ly6C<sup>+</sup>) recovered in the synovial fluid of the knee joints of mice treated as in (A). (E) ELISA of IL-1 $\beta$ , TNF $\alpha$  and IL-6 in tissue homogenates of knee joints of mice treated as in (A). ns,  $p > 0.05$ ; \*,  $p < 0.05$ ; \*\*,  $p < 0.005$ ; \*\*\*,  $p < 0.0002$ , One-way ANOVA, multiple comparison (Tukey test). Data with non-normal distribution were tested with Kruskal-Wallis test and multiple comparison using Dunn's test. Outliers were determined by the ROUT method and are represented with  $\Delta$ .

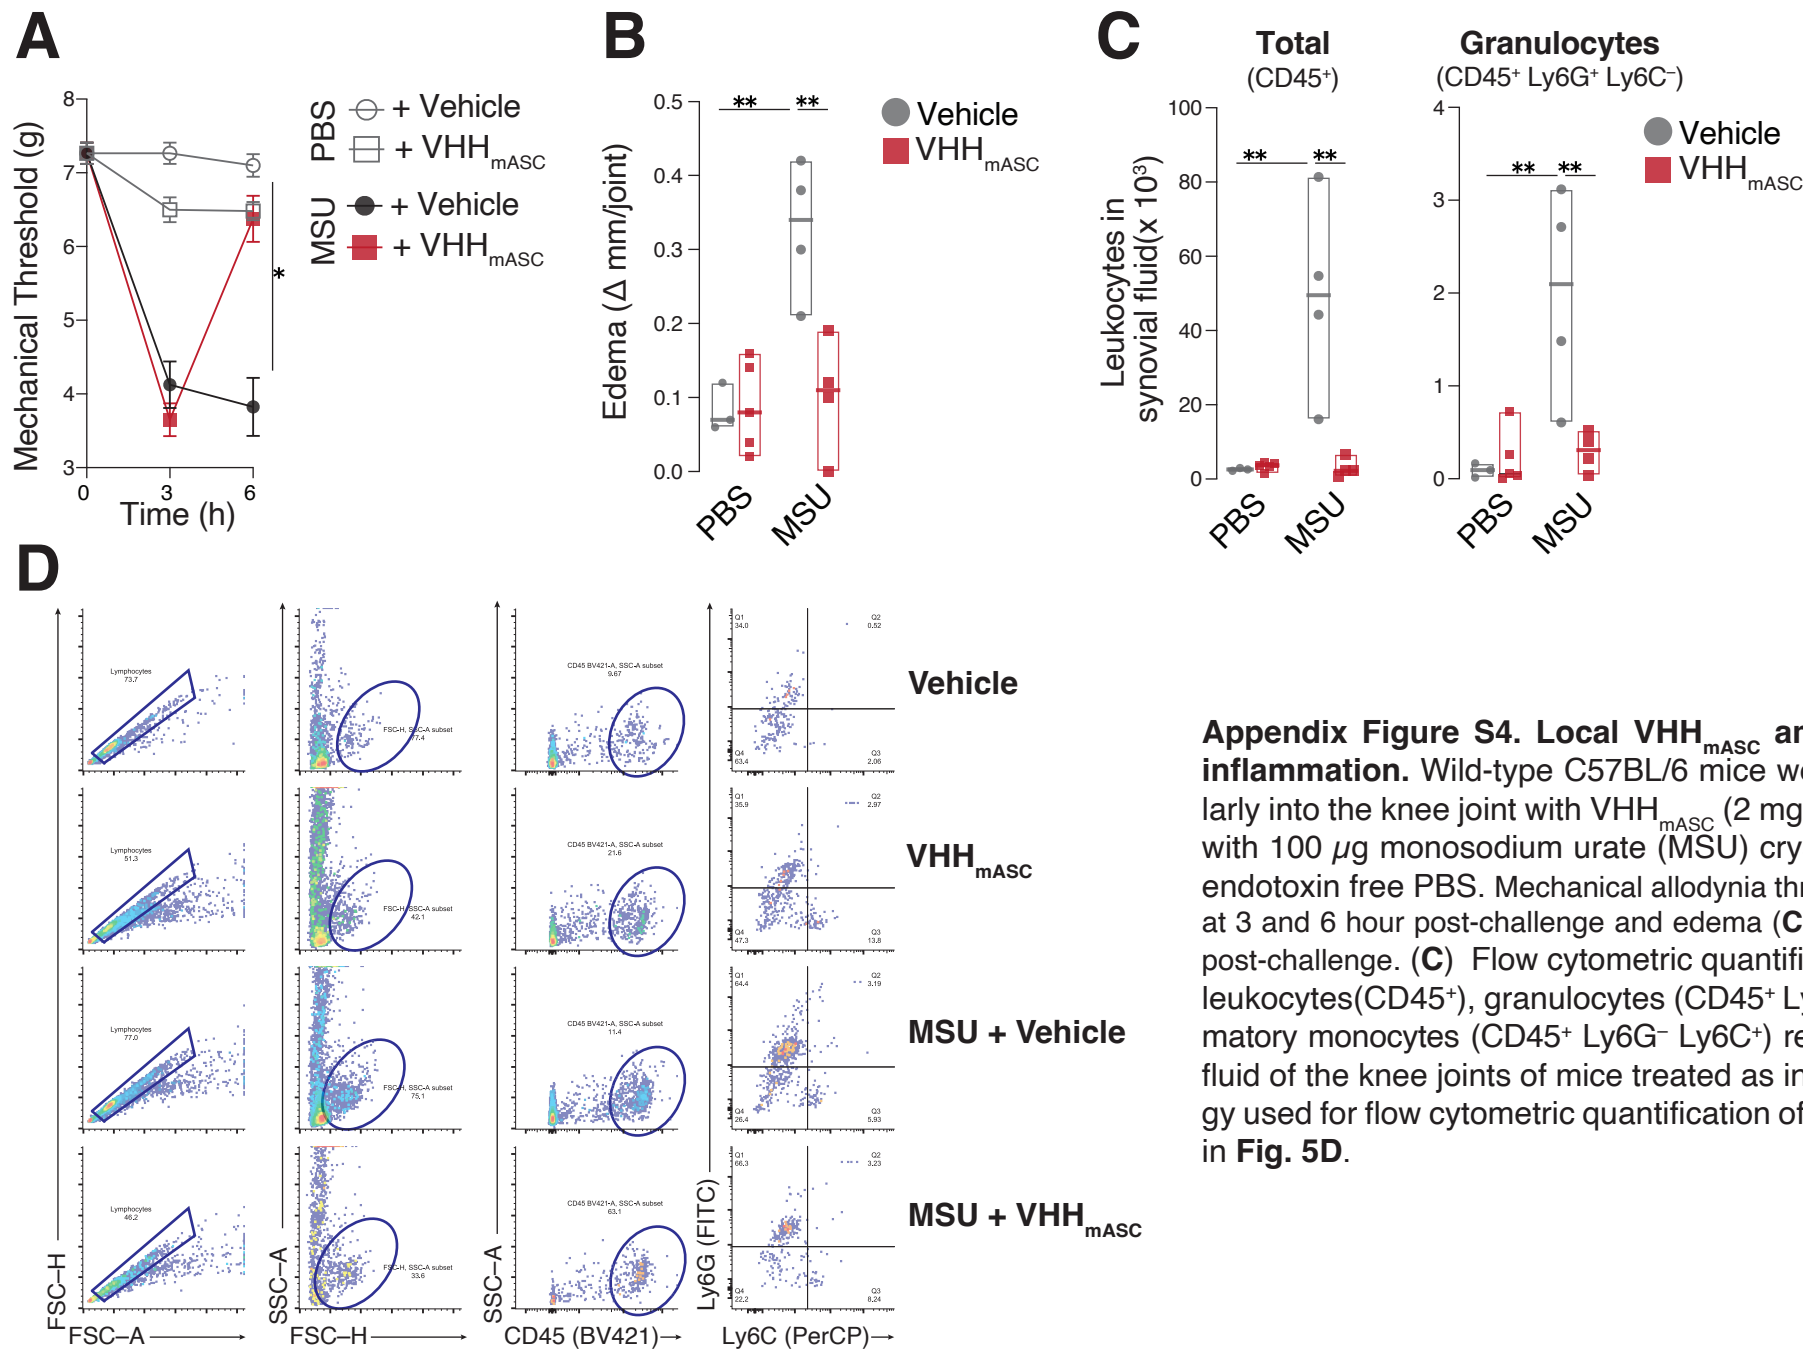

**Appendix Figure S4. Local VHH<sub>mASC</sub> ameliorates MSU gouty inflammation.** Wild-type C57BL/6 mice were injected intra-articularly into the knee joint with VHH<sub>mASC</sub> (2 mg/kg), or Vehicle together with 100  $\mu$ g monosodium urate (MSU) crystals dissolved in 10  $\mu$ L endotoxin free PBS. Mechanical allodynia threshold (**B**) was evaluated at 3 and 6 hour post-challenge and edema (**C**) was evaluated at 6 hour post-challenge. (**C**) Flow cytometric quantification of total infiltrating leukocytes (CD45<sup>+</sup>), granulocytes (CD45<sup>+</sup> Ly6G<sup>+</sup> Ly6C<sup>-</sup>), and inflammatory monocytes (CD45<sup>+</sup> Ly6G<sup>-</sup> Ly6C<sup>+</sup>) recovered in the synovial fluid of the knee joints of mice treated as in **A-B**. (**D**) Gating strategy used for flow cytometric quantification of infiltrating cells showed in **Fig. 5D**.
